# Supplementary material
Source: PubMed Central journal article supplement (PMC3360112)

# Supplemental Figure S1

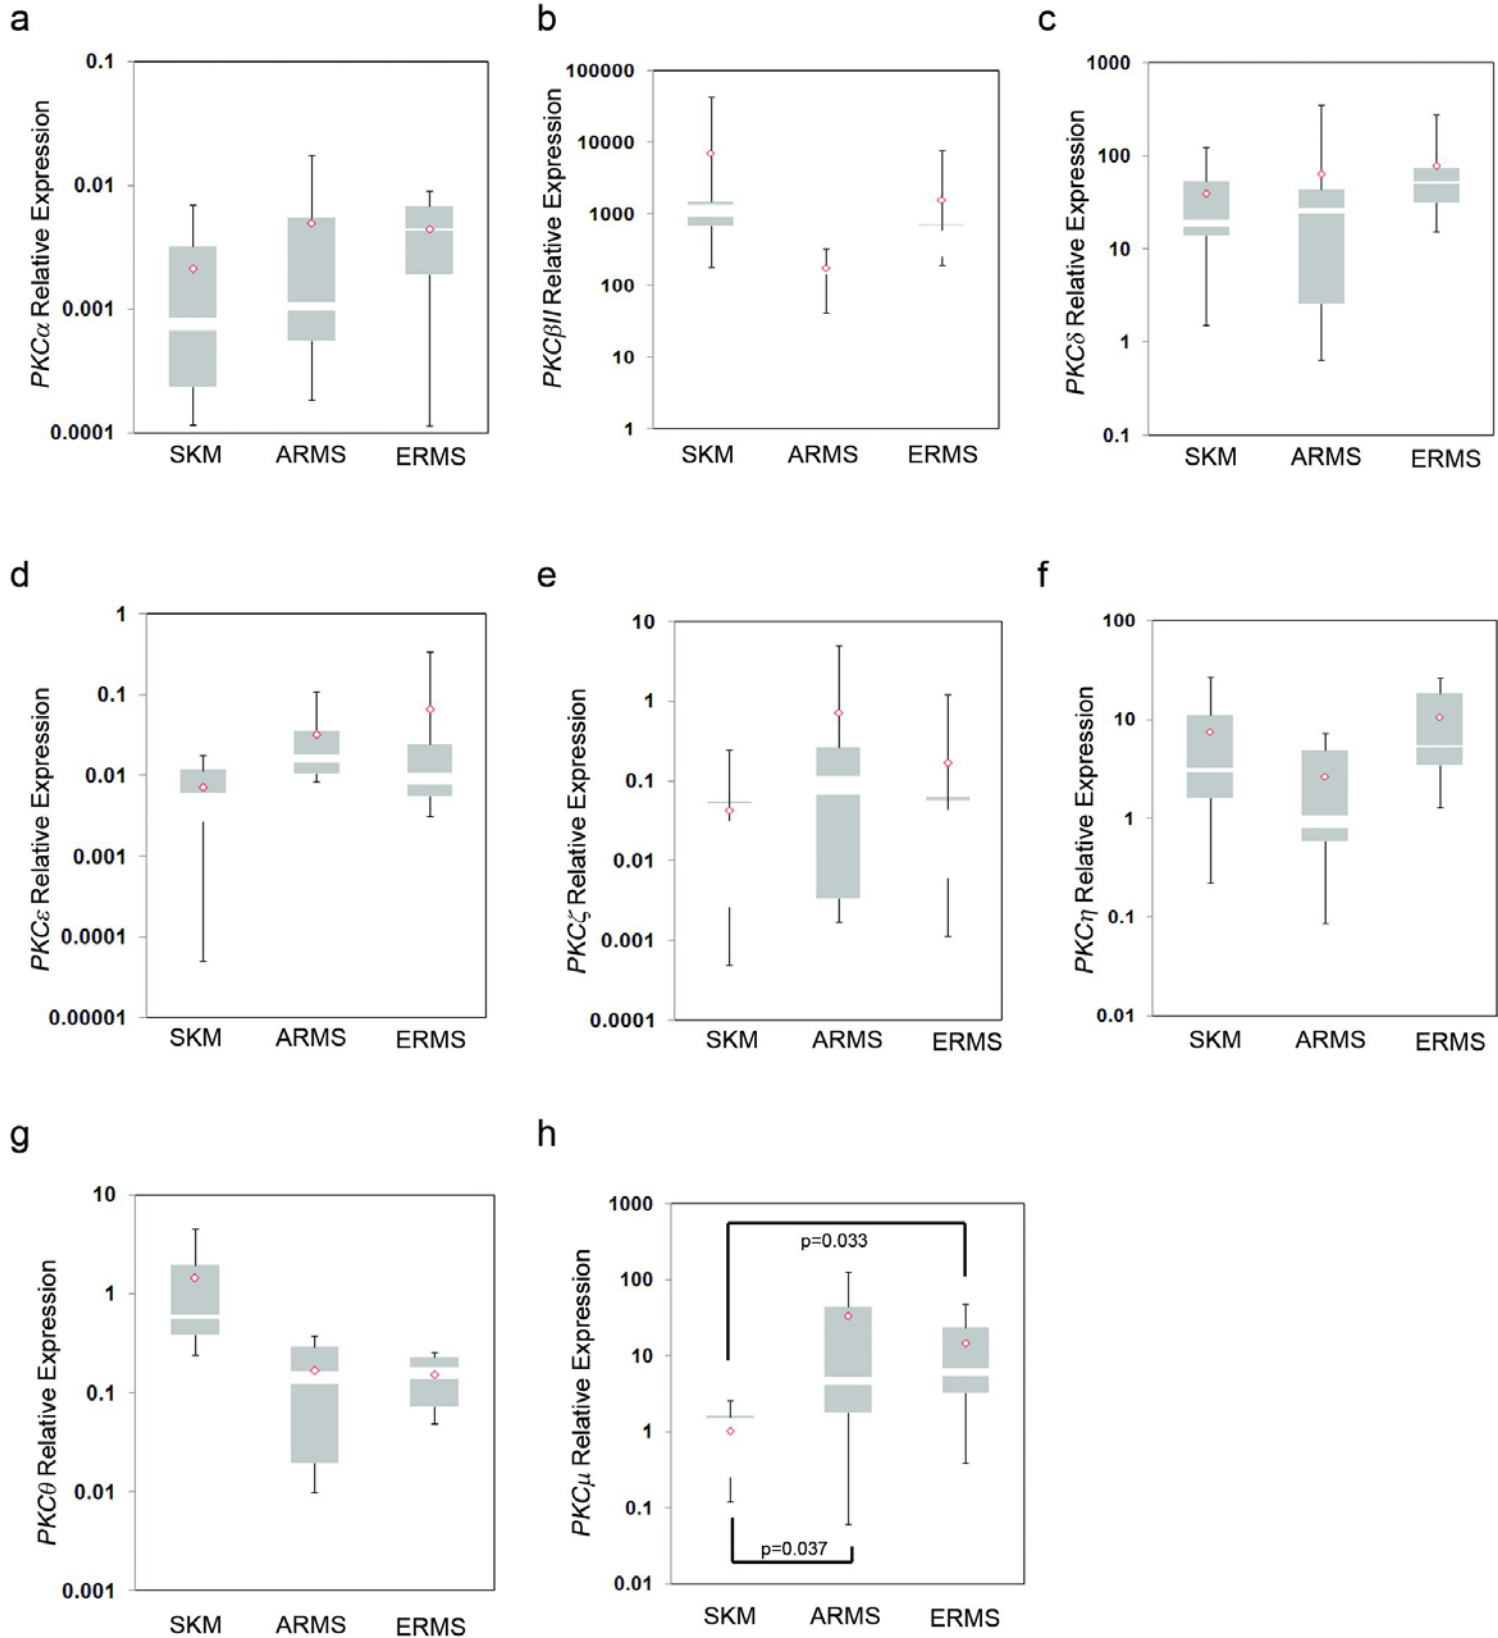

# Supplemental Figure S2

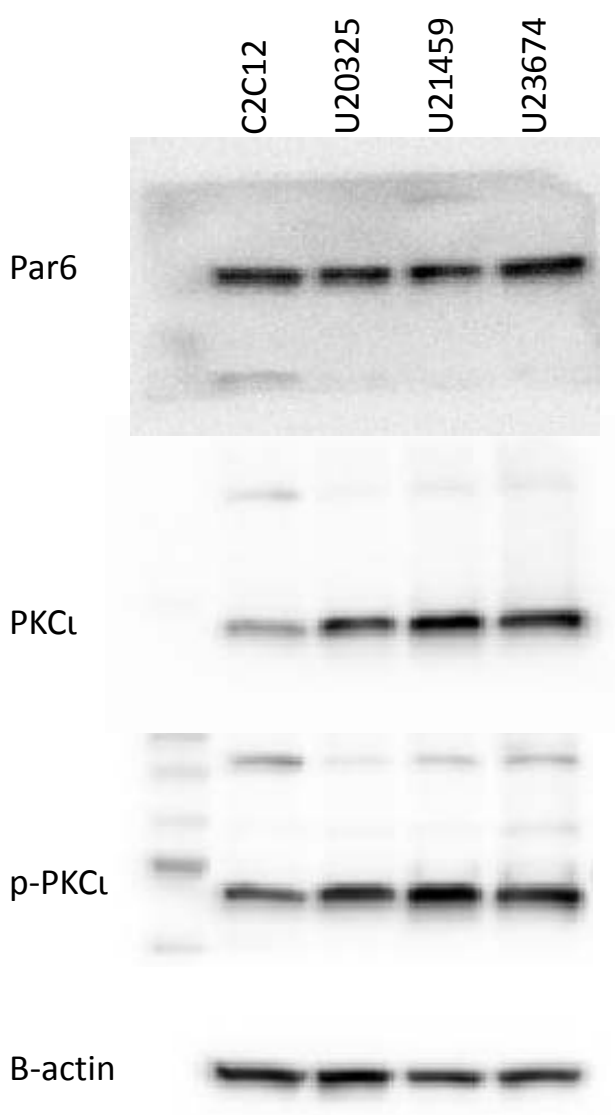

# Supplemental Figure S3

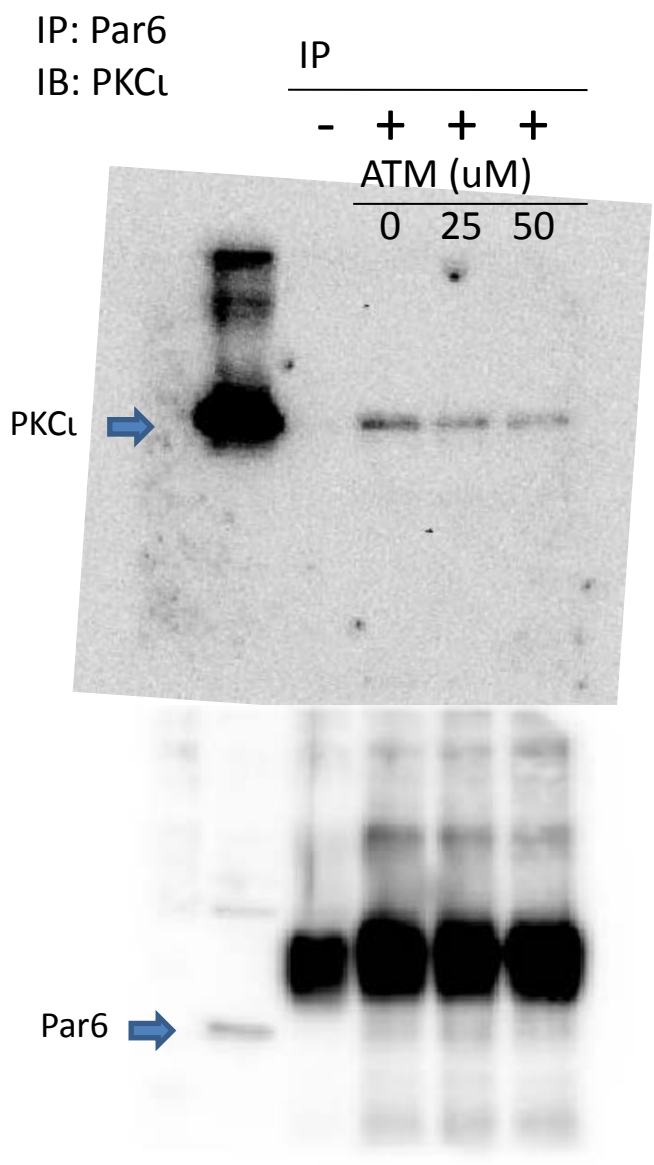

# Supplemental Figure S4

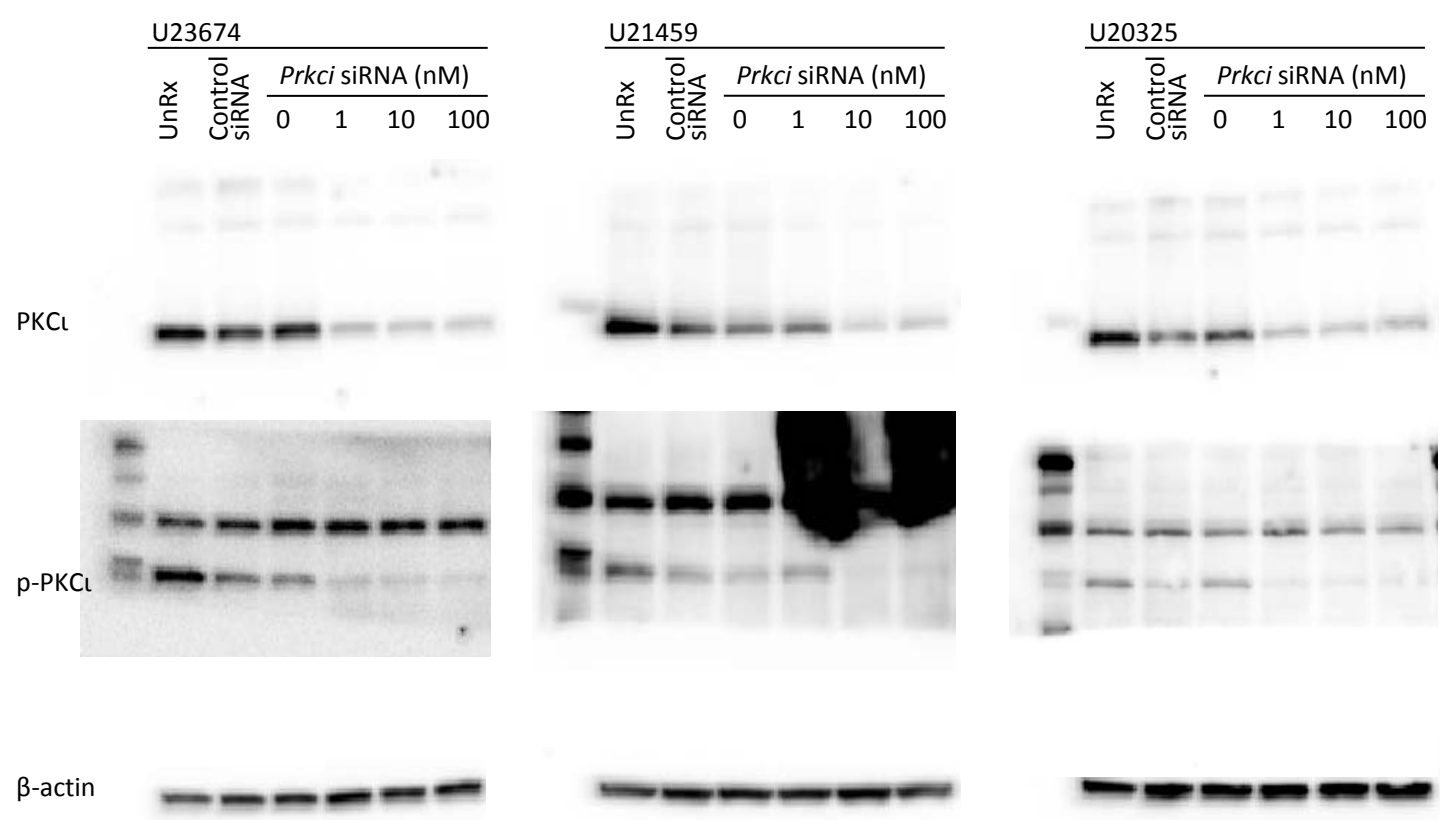

# Supplemental Figure S5

a

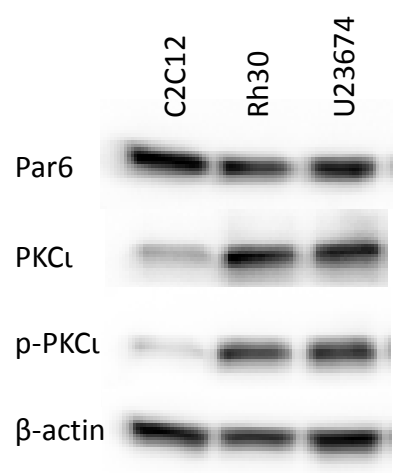

b

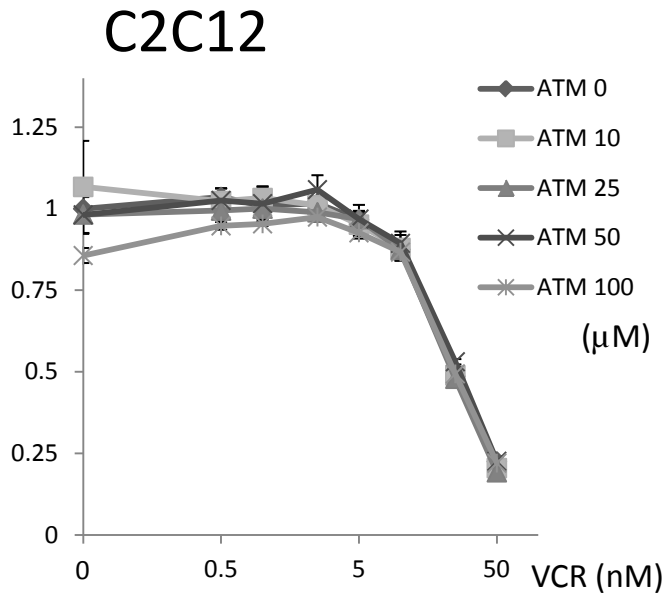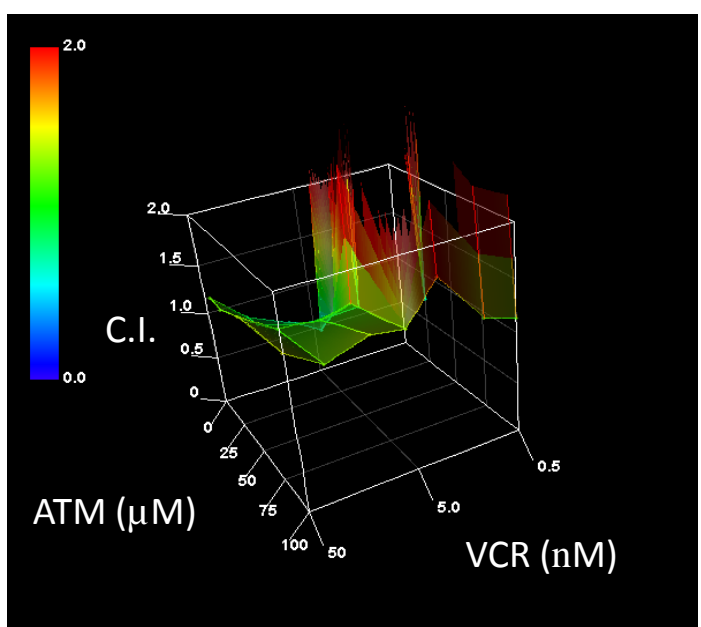

c

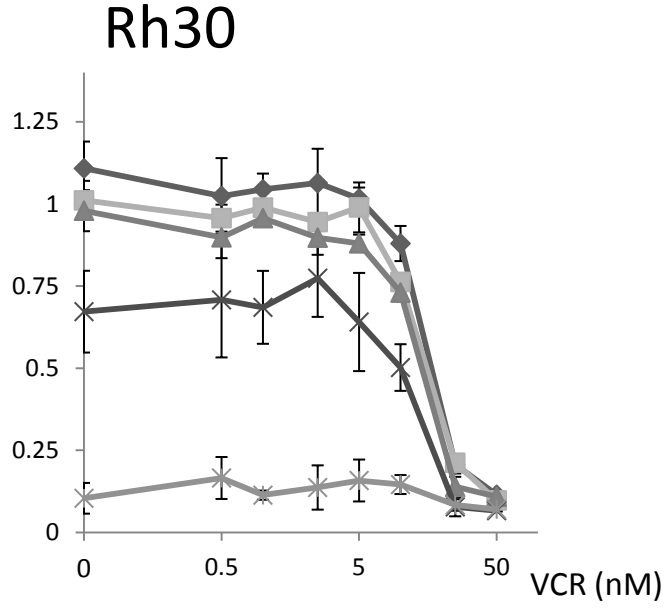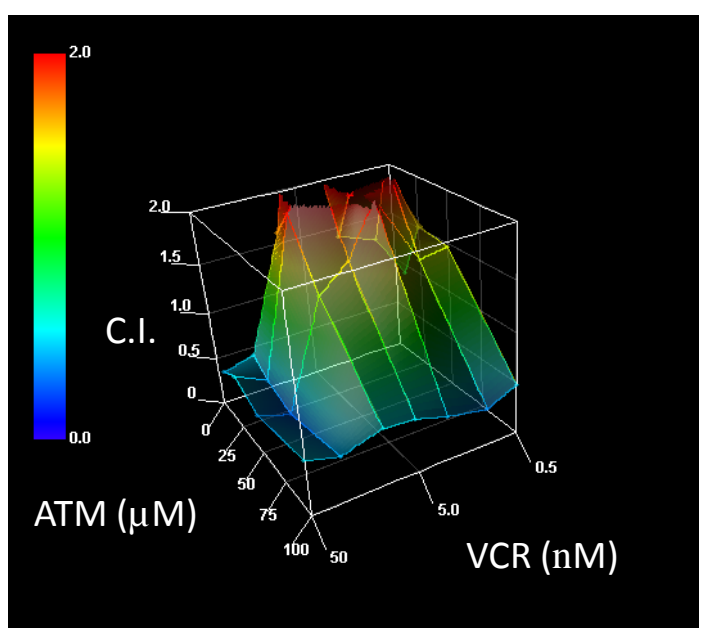

Supplemental Figure S6

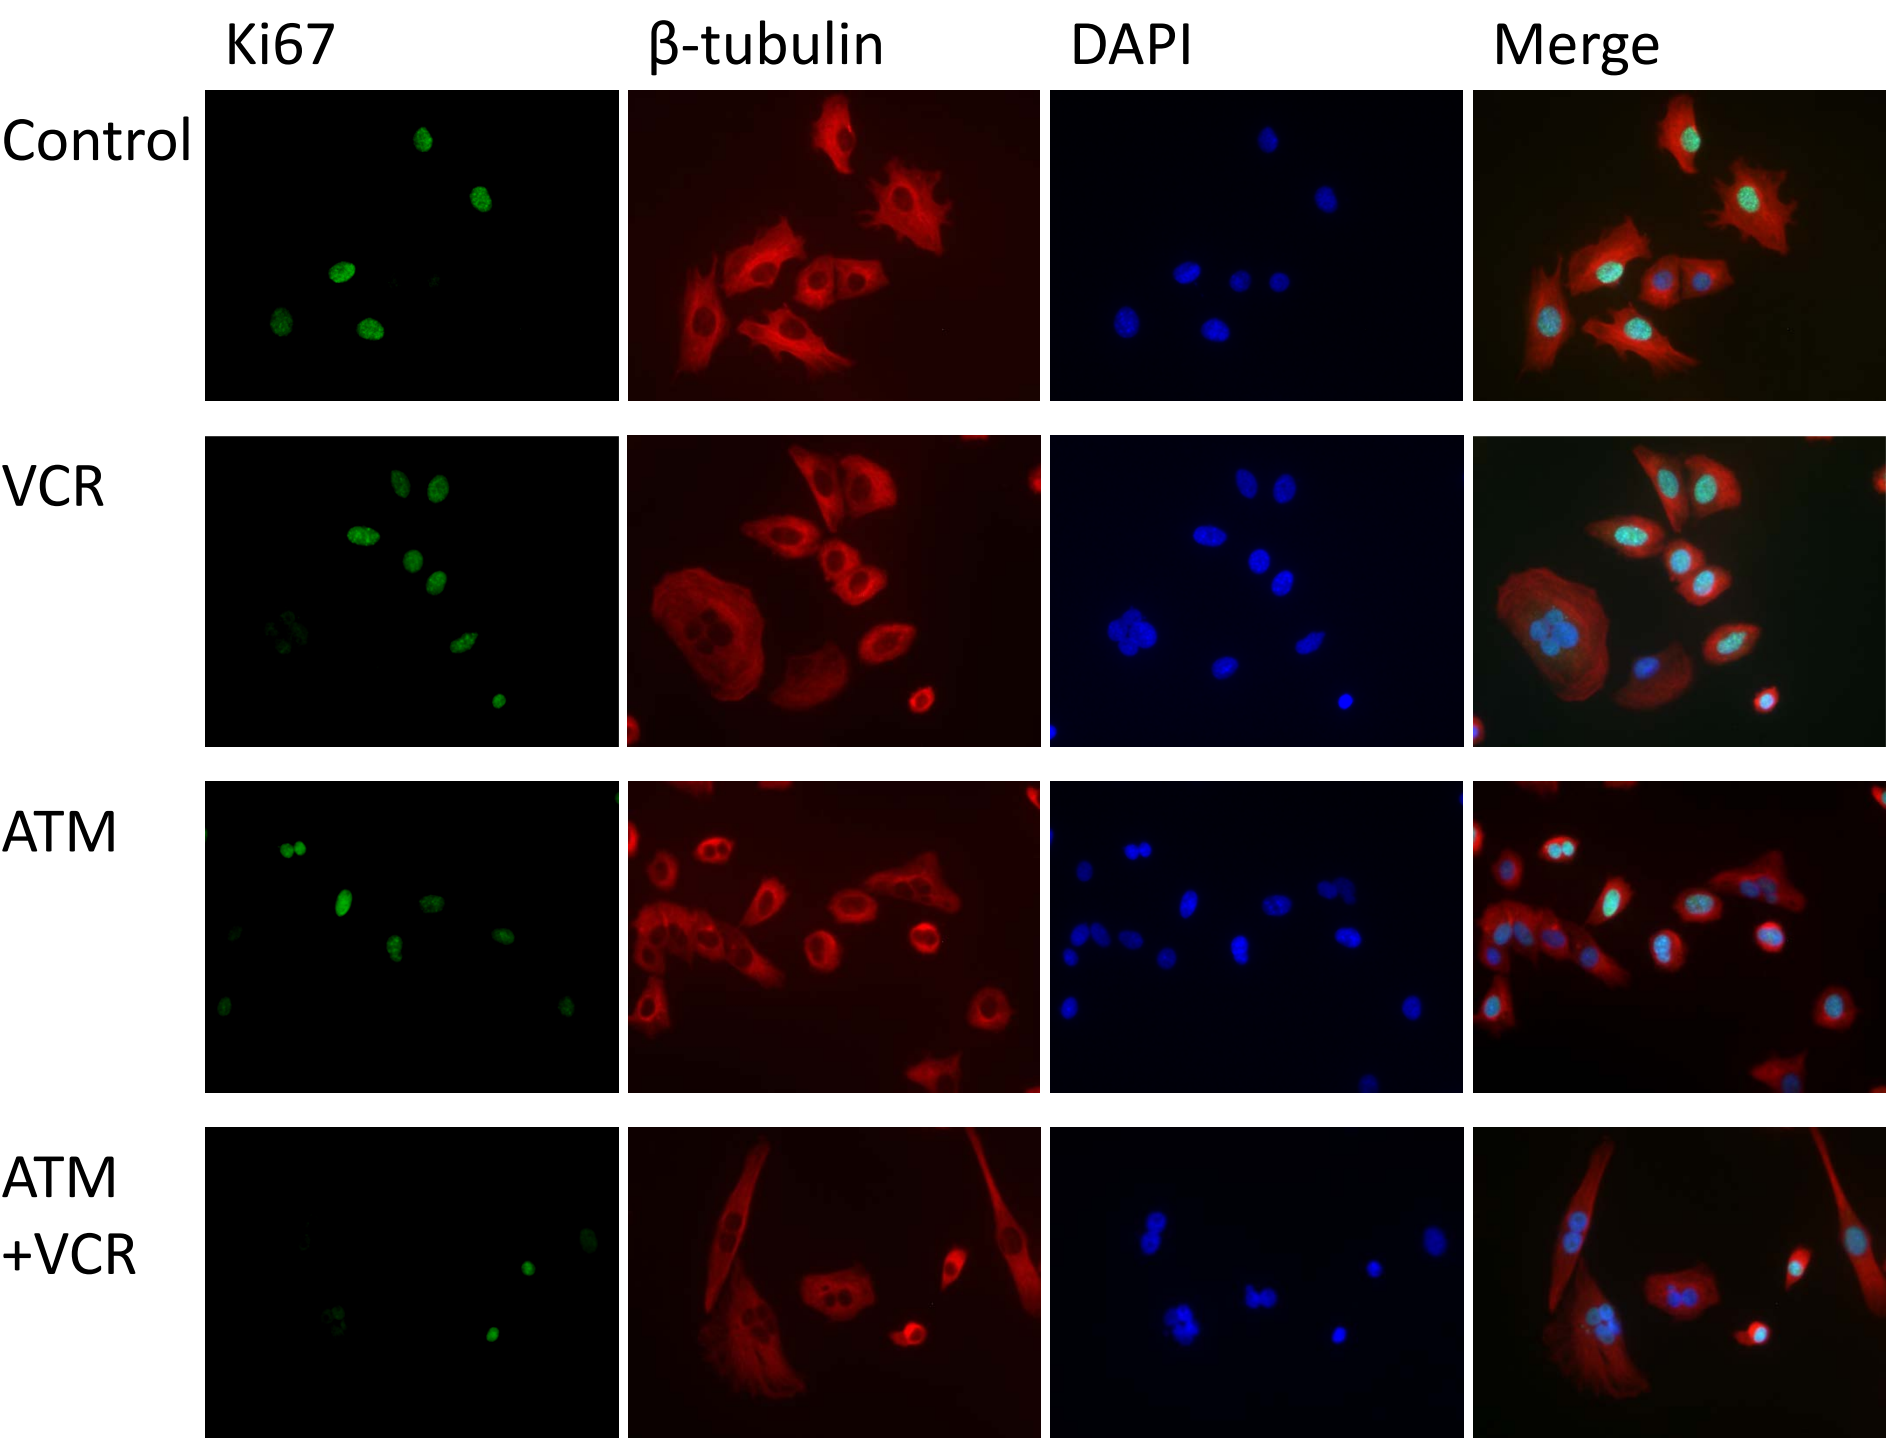

# Supplemental Figure S7

a

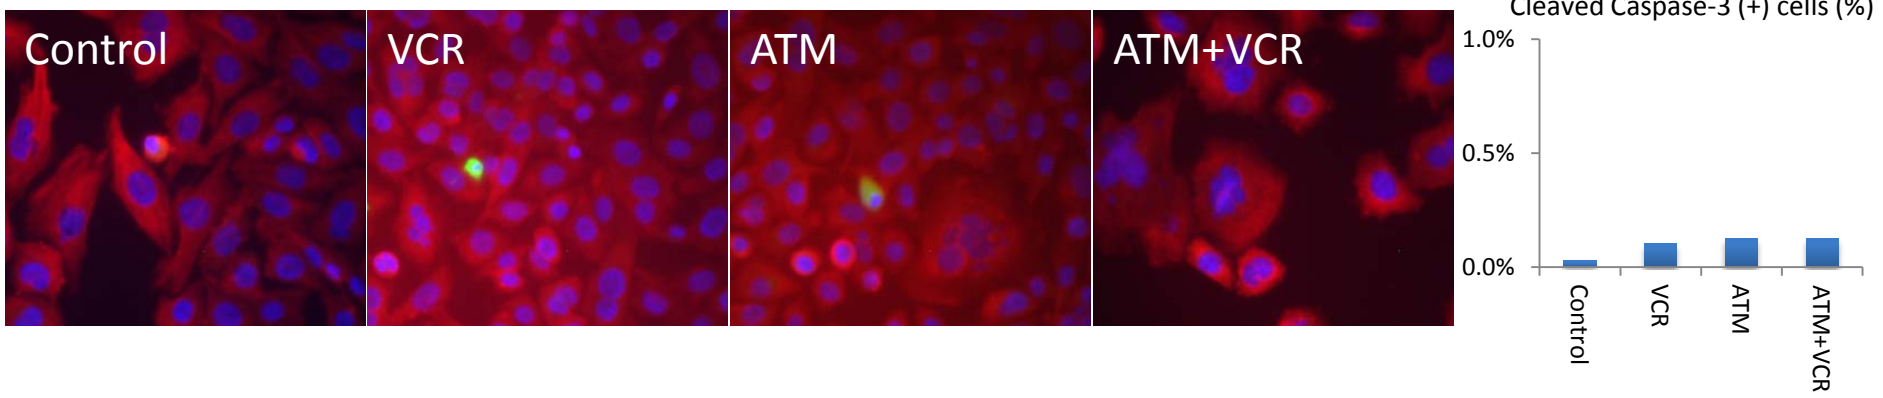

b

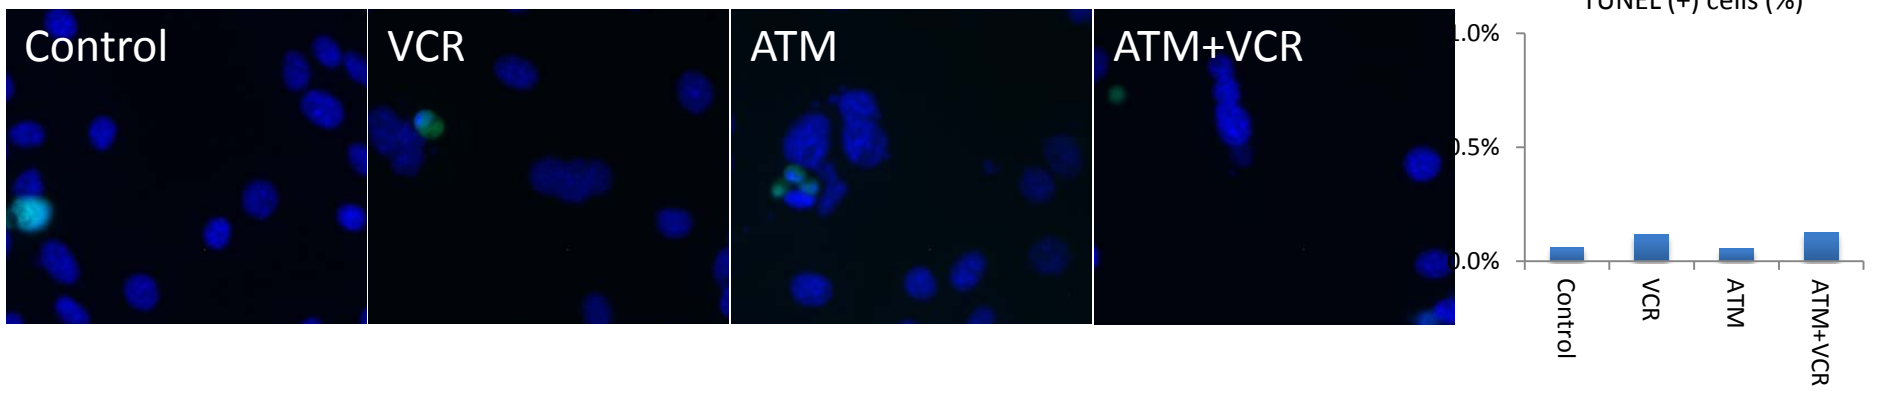

c

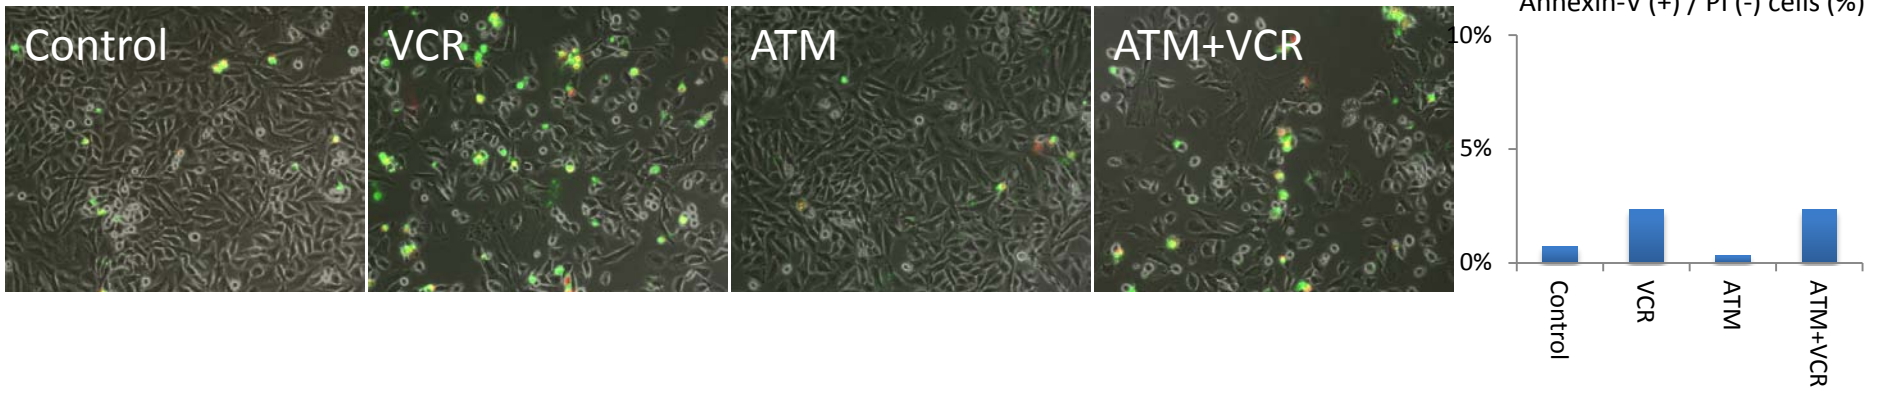

d

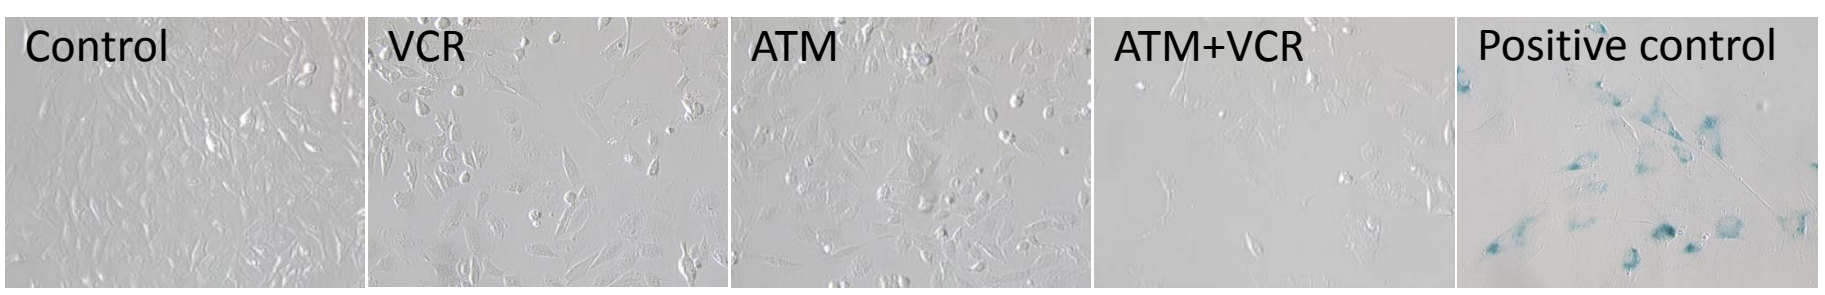

e

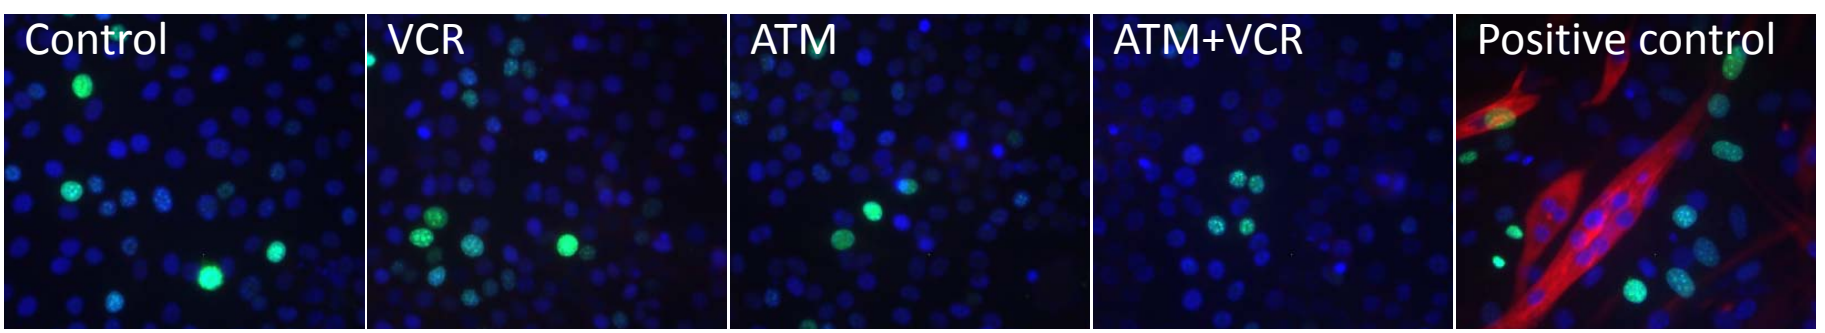

Supplement: NIHMS350802-supplement-2.pdf [file NIHMS350802-supplement-2.pdf]
